# Supplementary material for: Evaluation of the effects of nanocatalyst infiltration on the SOFC performance and electrode reaction kinetics using the transmission line model
Source: Royal Society of Chemistry journal article supplement (doi:10.1039/d0ta07166h), 2020-01-01
Supplement: d0ta07166h1.pdf [file d0ta07166h1.pdf]

## Electronic Supplementary Information

**Table S1.** The fit results of TLM ( $R_{s,el}$ ,  $R_{p,el}$ ,  $C_{p,el}$  and  $Q_{w,el}$ ) in Fig. 7 and Fig. 8 according to the equivalent circuit model in Fig. 2a.

♦  $R_{s,cat}$ .

| Fig. 7a,b |     | $pO_2 / \text{atm}$             |       |                                 |       |                                 |       |                                 |       |                                 |       |                                 |       |                                 |       |                                 |       |
|-----------|-----|---------------------------------|-------|---------------------------------|-------|---------------------------------|-------|---------------------------------|-------|---------------------------------|-------|---------------------------------|-------|---------------------------------|-------|---------------------------------|-------|
|           |     | 0.02                            |       | 0.04                            |       | 0.06                            |       | 0.08                            |       | 0.1                             |       | 0.2                             |       | 0.5                             |       | 1                               |       |
|           |     | $R_{s,cat} / \Omega\text{cm}^2$ | Err % |
| T/°C      | 800 | 3.98E-02                        | 0.03  | 5.63E-02                        | 0.03  | 6.90E-02                        | 0.07  | 7.97E-02                        | 0.06  | 8.91E-02                        | 0.00  | 1.26E-01                        | 0.05  | 1.99E-01                        | 0.08  | 2.82E-01                        | 0.01  |
|           | 750 | 7.91E-02                        | 0.09  | 1.12E-01                        | 0.06  | 1.37E-01                        | 0.08  | 1.58E-01                        | 0.00  | 1.77E-01                        | 0.00  | 2.50E-01                        | 0.01  | 3.95E-01                        | 0.03  | 5.59E-01                        | 0.00  |
|           | 700 | 1.68E-01                        | 0.10  | 2.38E-01                        | 0.10  | 2.92E-01                        | 0.02  | 3.37E-01                        | 0.08  | 3.77E-01                        | 0.00  | 5.33E-01                        | 0.02  | 8.42E-01                        | 0.02  | 1.19E+00                        | 0.03  |
|           | 650 | 3.89E-01                        | 0.03  | 5.51E-01                        | 0.04  | 6.75E-01                        | 0.06  | 7.79E-01                        | 0.06  | 8.71E-01                        | 0.00  | 1.23E+00                        | 0.06  | 1.95E+00                        | 0.06  | 2.75E+00                        | 0.06  |
|           | 600 | 9.91E-01                        | 0.07  | 1.40E+00                        | 0.07  | 1.72E+00                        | 0.01  | 1.98E+00                        | 0.09  | 2.22E+00                        | 0.01  | 3.13E+00                        | 0.02  | 4.96E+00                        | 0.08  | 7.01E+00                        | 0.04  |

♦  $R_{p,cat}$ .

| Fig. 7a,b |     | $pO_2 / \text{atm}$             |       |                                 |       |                                 |       |                                 |       |                                 |       |                                 |       |                                 |       |                                 |       |
|-----------|-----|---------------------------------|-------|---------------------------------|-------|---------------------------------|-------|---------------------------------|-------|---------------------------------|-------|---------------------------------|-------|---------------------------------|-------|---------------------------------|-------|
|           |     | 0.02                            |       | 0.04                            |       | 0.06                            |       | 0.08                            |       | 0.1                             |       | 0.2                             |       | 0.5                             |       | 1                               |       |
|           |     | $R_{p,cat} / \Omega\text{cm}^2$ | Err % |
| T/°C      | 800 | 3.07E-02                        | 2.28  | 3.33E-02                        | 2.94  | 3.31E-02                        | 2.95  | 3.21E-02                        | 3.06  | 2.88E-02                        | 4.55  | 2.47E-02                        | 4.45  | 1.30E-02                        | 7.20  | 8.50E-03                        | 8.95  |
|           | 750 | 1.50E-01                        | 2.01  | 1.45E-01                        | 1.36  | 1.41E-01                        | 1.14  | 1.36E-01                        | 1.08  | 1.32E-01                        | 1.07  | 1.11E-01                        | 1.56  | 6.63E-02                        | 3.45  | 3.81E-02                        | 5.14  |
|           | 700 | 4.50E-01                        | 1.56  | 4.23E-01                        | 1.13  | 4.09E-01                        | 0.98  | 3.99E-01                        | 0.92  | 3.90E-01                        | 0.89  | 3.46E-01                        | 1.05  | 2.38E-01                        | 2.55  | 1.39E-01                        | 4.65  |
|           | 650 | 1.35E+00                        | 1.19  | 1.24E+00                        | 1.15  | 1.21E+00                        | 1.05  | 1.18E+00                        | 0.99  | 1.16E+00                        | 0.96  | 1.07E+00                        | 0.95  | 8.64E-01                        | 1.53  | 5.73E-01                        | 3.73  |
|           | 600 | 3.97E+00                        | 1.21  | 3.72E+00                        | 1.08  | 3.61E+00                        | 1.06  | 3.53E+00                        | 1.06  | 3.48E+00                        | 1.06  | 3.27E+00                        | 1.16  | 2.86E+00                        | 1.47  | 2.15E+00                        | 3.11  |

♦  $C_{p,cat}$ .

| Fig. 7c |     | $pO_2 / atm$           |       |                        |       |                        |       |                        |       |                        |       |                        |       |                        |       |                        |       |
|---------|-----|------------------------|-------|------------------------|-------|------------------------|-------|------------------------|-------|------------------------|-------|------------------------|-------|------------------------|-------|------------------------|-------|
|         |     | 0.02                   |       | 0.04                   |       | 0.06                   |       | 0.08                   |       | 0.1                    |       | 0.2                    |       | 0.5                    |       | 1                      |       |
|         |     | $C_{p,cat} / Fcm^{-2}$ | Err % |
| T/°C    | 800 | 3.07E-02               | 5.25  | 3.33E-02               | 6.94  | 3.31E-02               | 6.73  | 3.21E-02               | 6.67  | 2.88E-02               | 8.42  | 2.47E-02               | 7.48  | 1.30E-02               | 9.13  | 8.50E-03               | 10.00 |
|         | 750 | 1.50E-01               | 4.37  | 1.45E-01               | 3.25  | 1.41E-01               | 2.77  | 1.36E-01               | 2.63  | 1.32E-01               | 2.63  | 1.11E-01               | 3.48  | 6.63E-02               | 5.36  | 3.81E-02               | 6.30  |
|         | 700 | 4.50E-01               | 3.15  | 4.23E-01               | 2.52  | 4.09E-01               | 2.25  | 3.99E-01               | 2.14  | 3.90E-01               | 2.10  | 3.46E-01               | 2.47  | 2.38E-01               | 4.60  | 1.39E-01               | 5.95  |
|         | 650 | 1.35E+00               | 2.67  | 1.24E+00               | 2.37  | 1.21E+00               | 2.23  | 1.18E+00               | 2.16  | 1.16E+00               | 2.12  | 1.07E+00               | 2.16  | 8.64E-01               | 3.25  | 5.73E-01               | 5.68  |
|         | 600 | 3.97E+00               | 2.56  | 3.72E+00               | 2.30  | 3.61E+00               | 2.23  | 3.53E+00               | 2.23  | 3.48E+00               | 2.22  | 3.27E+00               | 2.40  | 2.86E+00               | 3.12  | 2.15E+00               | 5.41  |

♦  $R_{s,ano}, R_{p,ano}$ .

| Fig. 8a, 800°C |     | $R_{s,ano} / \Omega cm^2$ | Err % | $R_{p,ano} / \Omega cm^2$ | Err % | Fig. 8b, $pH_2=0.4atm$ |     | $R_{s,ano} / \Omega cm^2$ | Err % | $R_{p,ano} / \Omega cm^2$ | Err % |
|----------------|-----|---------------------------|-------|---------------------------|-------|------------------------|-----|---------------------------|-------|---------------------------|-------|
| $pH_2 / atm$   | 0.4 | 3.89E-02                  | 18.81 | 5.17E-02                  | 5.59  | T/°C                   | 800 | 4.14E-02                  | 19.35 | 7.89E-02                  | 23.40 |
|                | 0.5 | 4.13E-02                  | 17.61 | 5.43E-02                  | 5.34  |                        | 750 | 7.17E-02                  | 18.13 | 1.16E-01                  | 21.29 |
|                | 0.6 | 4.26E-02                  | 16.12 | 5.60E-02                  | 4.64  |                        | 700 | 1.28E-01                  | 16.39 | 2.07E-01                  | 19.12 |
|                | 0.7 | 4.30E-02                  | 15.43 | 5.73E-02                  | 4.12  |                        | 650 | 2.39E-01                  | 17.83 | 4.41E-01                  | 23.80 |
|                | 0.8 | 3.76E-02                  | 22.53 | 5.98E-02                  | 4.85  |                        | 600 | 4.67E-01                  | 18.20 | 1.18E+00                  | 19.43 |

♦  $Q_w, C_{p,ano}$ .

| Fig. 8c, 800°C |     | $Q_w / Fs^{1/2} cm^{-2}$ | Err % | $C_{p,ano} / Fcm^{-2}$ | Err % | Fig. 8d, $pH_2=0.4atm$ |     | $Q_w / Fs^{1/2} cm^{-2}$ | Err % | $C_{p,ano} / Fcm^{-2}$ | Err % |
|----------------|-----|--------------------------|-------|------------------------|-------|------------------------|-----|--------------------------|-------|------------------------|-------|
| $pH_2 / atm$   | 0.4 | 1.18E-01                 | 11.77 | 9.11E-04               | 22.22 | T/°C                   | 800 | 1.44E-01                 | 3.14  | 1.00E-03               | 20.23 |
|                | 0.5 | 1.18E-01                 | 10.75 | 9.94E-04               | 20.57 |                        | 750 | 9.95E-02                 | 3.22  | 7.86E-04               | 26.00 |
|                | 0.6 | 1.18E-01                 | 9.71  | 1.07E-03               | 18.33 |                        | 700 | 7.11E-02                 | 3.83  | 7.78E-04               | 25.20 |
|                | 0.7 | 1.20E-01                 | 9.08  | 1.13E-03               | 17.18 |                        | 650 | 5.45E-02                 | 4.11  | 7.37E-04               | 26.34 |
|                | 0.8 | 1.33E-01                 | 11.43 | 1.09E-03               | 24.34 |                        | 600 | 4.47E-02                 | 3.98  | 6.90E-04               | 38.45 |

**Table S2. The fit results of TLM ( $R_{s,eb}$ ,  $R_{p,eb}$ ,  $C_{p,el}$  and  $Q_{w,el}$ ) in Fig. 12 according to the equivalent circuit model in Fig. 2a.**

♦ **Anode**

| Fig. 12a |     | Original                        |       |                                 |       | Infiltrated                     |       |                                 |       |
|----------|-----|---------------------------------|-------|---------------------------------|-------|---------------------------------|-------|---------------------------------|-------|
|          |     | $R_{s,ano} / \Omega\text{cm}^2$ | Err % | $R_{p,ano} / \Omega\text{cm}^2$ | Err % | $R_{s,ano} / \Omega\text{cm}^2$ | Err % | $R_{p,ano} / \Omega\text{cm}^2$ | Err % |
| T/°C     | 700 | 1.28E-01                        | 16.39 | 2.07E-01                        | 19.12 | 4.54E-02                        | 4.47  | 2.98E-01                        | 1.03  |
|          | 650 | 2.39E-01                        | 17.83 | 4.41E-01                        | 23.80 | 8.33E-02                        | 5.34  | 6.07E-01                        | 1.28  |
|          | 600 | 4.67E-01                        | 18.20 | 1.18E+00                        | 19.43 | 1.81E-01                        | 8.03  | 1.38E+00                        | 1.68  |

| Fig. 12b |     | Original                              |       |                               |       | Infiltrated                           |       |                               |       |
|----------|-----|---------------------------------------|-------|-------------------------------|-------|---------------------------------------|-------|-------------------------------|-------|
|          |     | $Q_w / \text{Fs}^{1/2}\text{cm}^{-2}$ | Err % | $C_{p,ano} / \text{Fcm}^{-2}$ | Err % | $Q_w / \text{Fs}^{1/2}\text{cm}^{-2}$ | Err % | $C_{p,ano} / \text{Fcm}^{-2}$ | Err % |
| T/°C     | 700 | 7.11E-02                              | 3.83  | 7.78E-04                      | 0.09  | 5.41E-02                              | 1.26  | 5.08E-04                      | 13.00 |
|          | 650 | 5.45E-02                              | 4.11  | 7.37E-04                      | 0.05  | 3.76E-02                              | 1.24  | 4.78E-04                      | 18.60 |
|          | 600 | 4.47E-02                              | 3.98  | 6.90E-04                      | 0.03  | 2.57E-02                              | 1.18  | 4.28E-04                      | 13.00 |

♦ **Cathode**

| Fig. 12c |     | Original                         |       |                                  |       | Infiltrated                      |       |                                  |       |
|----------|-----|----------------------------------|-------|----------------------------------|-------|----------------------------------|-------|----------------------------------|-------|
|          |     | $R_{s,cat.} / \Omega\text{cm}^2$ | Err % | $R_{p,cat.} / \Omega\text{cm}^2$ | Err % | $R_{s,cat.} / \Omega\text{cm}^2$ | Err % | $R_{p,cat.} / \Omega\text{cm}^2$ | Err % |
| T/°C     | 700 | 5.33E-01                         | 0.07  | 3.46E-01                         | 1.05  | 9.52E-03                         | 5.06  | 2.15E-01                         | 1.24  |
|          | 650 | 1.23E+00                         | 0.04  | 1.07E+00                         | 0.95  | 1.68E-02                         | 5.93  | 5.58E-01                         | 1.21  |
|          | 600 | 3.13E+00                         | 0.01  | 3.27E+00                         | 1.16  | 2.69E-02                         | 10.87 | 1.45E+00                         | 1.31  |

| Fig. 12d |     | Original                      |       | Infiltrated                   |       |
|----------|-----|-------------------------------|-------|-------------------------------|-------|
|          |     | $C_{p,cat} / \text{Fcm}^{-2}$ | Err % | $C_{p,cat} / \text{Fcm}^{-2}$ | Err % |
| T/°C     | 700 | 8.33E-02                      | 2.47  | 5.48E-03                      | 1.32  |
|          | 650 | 4.37E-02                      | 2.16  | 4.78E-03                      | 1.36  |
|          | 600 | 2.89E-02                      | 2.40  | 4.43E-03                      | 1.55  |

**Table S3. The fit results of half-cell in Fig. S3c compared to full-cell data in Fig. 12c.**

| Half                   |                     |                                 |      |                                 |      |                                 |      |                                 |      |
|------------------------|---------------------|---------------------------------|------|---------------------------------|------|---------------------------------|------|---------------------------------|------|
| T/°C                   | $1000T^{-1}/K^{-1}$ | $\log(R_{s,ori} / \Omega cm^2)$ | err  | $\log(R_{s,inf} / \Omega cm^2)$ | err  | $\log(R_{p,ori} / \Omega cm^2)$ | err  | $\log(R_{p,inf} / \Omega cm^2)$ | err  |
| 600                    | 1.02759             | -0.13                           | 0.03 | -0.81                           | 0.01 | -0.40                           | 0.02 | -1.11                           | 0.00 |
| 650                    | 1.08325             | 0.35                            | 0.02 | -0.61                           | 0.06 | -0.01                           | 0.02 | -0.76                           | 0.03 |
| 700                    | 1.14528             | 0.61                            | 0.03 | -0.31                           | 0.02 | 0.69                            | 0.09 | -0.28                           | 0.01 |
| Activation energy / eV |                     | 1.40                            | 0.20 | 1.40                            | 0.20 | 1.10                            | 0.30 | 1.20                            | 0.10 |

| Full                   |                     |                                 |      |                                 |      |                                 |      |                                 |      |
|------------------------|---------------------|---------------------------------|------|---------------------------------|------|---------------------------------|------|---------------------------------|------|
| T/°C                   | $1000T^{-1}/K^{-1}$ | $\log(R_{s,ori} / \Omega cm^2)$ | err  | $\log(R_{s,inf} / \Omega cm^2)$ | err  | $\log(R_{p,ori} / \Omega cm^2)$ | err  | $\log(R_{p,inf} / \Omega cm^2)$ | err  |
| 600                    | 1.02759             | -0.27                           | 0.00 | -2.02                           | 0.02 | -0.46                           | 0.00 | -0.67                           | 0.01 |
| 650                    | 1.08325             | 0.09                            | 0.00 | -1.77                           | 0.03 | 0.03                            | 0.00 | -0.25                           | 0.01 |
| 700                    | 1.14528             | 0.50                            | 0.00 | -1.57                           | 0.05 | 0.51                            | 0.01 | 0.16                            | 0.01 |
| Activation energy / eV |                     | 1.30                            | 0.00 | 0.80                            | 0.10 | 1.65                            | 0.06 | 1.40                            | 0.05 |

**Table S4. The fit results of half-cell in Fig. S3d compared to full-cell data in Fig. 12d.**

| Half              |                     |                              |      |                              |      |
|-------------------|---------------------|------------------------------|------|------------------------------|------|
| T/°C              | $1000T^{-1}/K^{-1}$ | $\log(C_{p,ori} / Fcm^{-2})$ | err  | $\log(C_{p,inf} / Fcm^{-2})$ | err  |
| 600               | 1.02759             | -1.39                        | 0.02 | -1.69                        | 0.04 |
| 650               | 1.08325             | -1.61                        | 0.07 | -1.85                        | 0.03 |
| 700               | 1.14528             | -1.92                        | 0.03 | -2.19                        | 0.02 |
| Activation energy |                     | 0.80                         | 0.10 | 0.70                         | 0.10 |

| Full              |                     |                              |      |                              |      |
|-------------------|---------------------|------------------------------|------|------------------------------|------|
| T/°C              | $1000T^{-1}/K^{-1}$ | $\log(C_{p,ori} / Fcm^{-2})$ | err  | $\log(C_{p,inf} / Fcm^{-2})$ | err  |
| 600               | 1.02759             | -1.08                        | 0.01 | -2.26                        | 0.01 |
| 650               | 1.08325             | -1.36                        | 0.01 | -2.32                        | 0.01 |
| 700               | 1.14528             | -1.54                        | 0.01 | -2.35                        | 0.01 |
| Activation energy |                     | 0.80                         | 0.10 | 0.16                         | 0.03 |
